# Supplementary material for: Protein Kinase A-induced tamoxifen resistance is mediated by anchoring protein AKAP13
Source: PubMed Central journal article supplement (PMC4536754; doi:10.1186/s12885-015-1591-4), 2015-08-14

# S2

## MCF7 cell proliferation

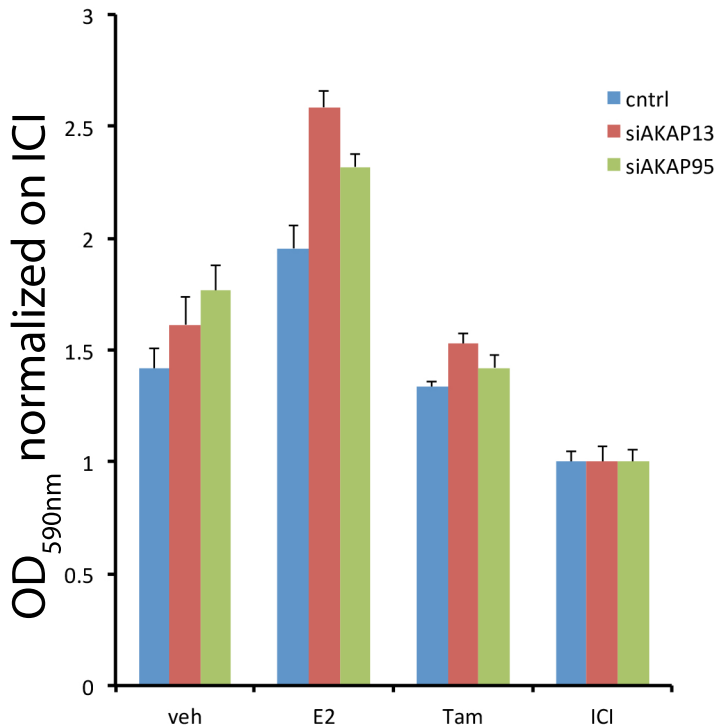

Supplement: 12885_2015_1591_MOESM2_ESM.pdf [file 12885_2015_1591_MOESM2_ESM.pdf]
