# Supplementary material for: Protein Kinase A-induced tamoxifen resistance is mediated by anchoring protein AKAP13
Source: PubMed Central journal article supplement (PMC4536754; doi:10.1186/s12885-015-1591-4), 2015-08-14
Supplement: 12885_2015_1591_MOESM3_ESM.pdf [file 12885_2015_1591_MOESM3_ESM.pdf]

**probe1**

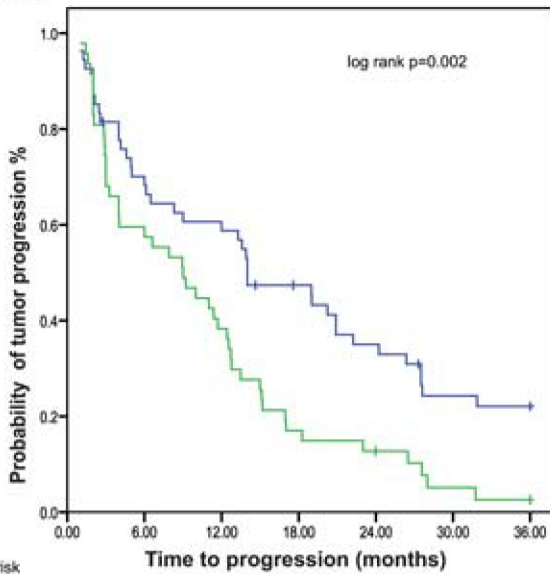

No. at risk

|            |    |    |    |    |    |    |    |
|------------|----|----|----|----|----|----|----|
| AKAP13low  | 54 | 37 | 32 | 23 | 17 | 11 | 10 |
| AKAP13high | 47 | 28 | 18 | 8  | 5  | 2  | 1  |

**probe 2**

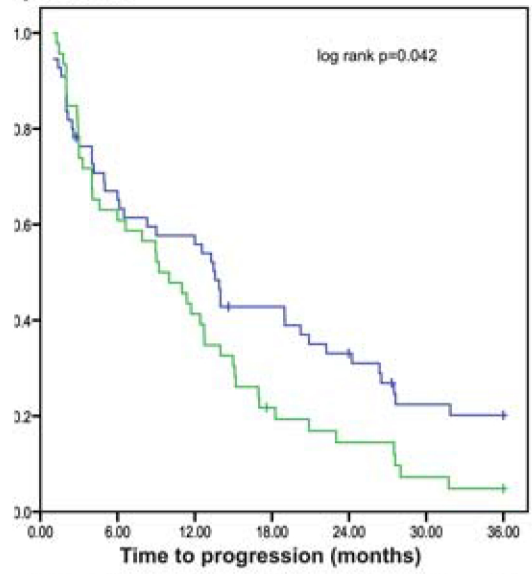

No. at risk

|            |    |    |    |    |    |    |   |
|------------|----|----|----|----|----|----|---|
| AKAP13low  | 55 | 36 | 31 | 22 | 16 | 10 | 9 |
| AKAP13high | 46 | 29 | 19 | 9  | 6  | 3  | 2 |

AKAP13  
Low: —  
High: —

**probe3**

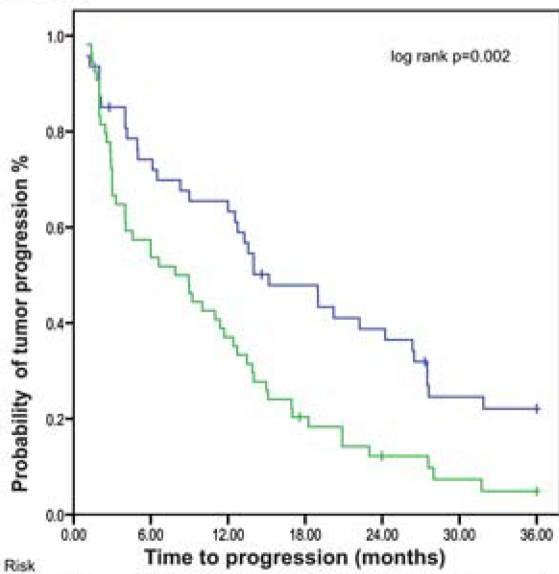

No. at Risk

|            |    |    |    |    |    |    |   |
|------------|----|----|----|----|----|----|---|
| AKAP13low  | 47 | 34 | 30 | 21 | 17 | 10 | 9 |
| AKAP13high | 54 | 31 | 20 | 10 | 6  | 3  | 2 |

**probe4**

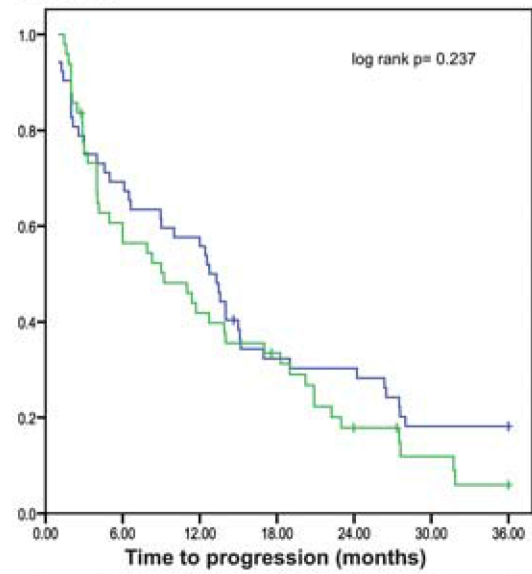

No. at Risk

|            |    |    |    |    |    |   |   |
|------------|----|----|----|----|----|---|---|
| AKAP13low  | 52 | 36 | 30 | 16 | 15 | 9 | 9 |
| AKAP13high | 49 | 29 | 20 | 15 | 7  | 4 | 2 |
