# Supplementary material for: Protein Kinase A-induced tamoxifen resistance is mediated by anchoring protein AKAP13
Source: PubMed Central journal article supplement (PMC4536754; doi:10.1186/s12885-015-1591-4), 2015-08-14
Supplement: 12885_2015_1591_MOESM4_ESM.pdf [file 12885_2015_1591_MOESM4_ESM.pdf]

### Supplement table 1 Univariate analysis for different AKAP probes

| Variable                       | HR   | 95% CI     | P-value |
|--------------------------------|------|------------|---------|
| AKAP13Probe1<br>(A_24_P155761) | 2.74 | 1.20-6.27  | 0.017   |
| AKAP13Probe2<br>(A_24_P164337) | 3.21 | 0.76-13.61 | 0.114   |
| AKAP13Probe3<br>(A_23_P137276) | 3.14 | 0.61-16.20 | 0.171   |
| AKAP13Probe4<br>(A_24_P142095) | 2.34 | 0.54-10.17 | 0.255   |
| AKAP95<br>(A_23_P142380)       | 4.60 | 0.56-37.73 | 0.155   |

Univariate Cox regression analysis for risk of progression after tamoxifen treatment for metastatic disease. NKI and EMC patients are included. Continuous variable for 4 different AKAP13 probes are used.

### Supplemental table 2. Univariate analysis

| Variable                                        | HR    | 95% CI    | P-value |
|-------------------------------------------------|-------|-----------|---------|
| Estrogen receptor*<br>(high vs low)             | 0.42  | 0.23-0.75 | 0.003   |
| Progesterone receptor<br>(positive vs negative) | 0.46  | 0.27-0.78 | 0.004   |
| AKAP13 (high vs low)                            | 2.10  | 1.22-3.59 | 0.007   |
| Tumor diameter<br>(> 20 mm vs ≤ 20 mm)          | 1.39  | 0.83-2.33 | 0.216   |
| Lymph node status<br>(positive vs negative)     | 1.26  | 0.72-2.21 | 0.415   |
| Histological grade<br>(grade III vs grade I-II) | 1.12  | 0.62-2.00 | 0.703   |
| HER2 status<br>(positive vs negative)           | 1.148 | 0.41-3.22 | 0.793   |

Univariate Cox regression analysis for risk of progression after tamoxifen treatment for metastatic disease. \* Estrogen receptor low ≥ 10% < 75%), high (≥ 75%). Only NKI patients were analysed

### Supplemental table 3. Multivariate analysis

| Variable                                        | HR   | 95% CI    | P-value |
|-------------------------------------------------|------|-----------|---------|
| Estrogen receptor*<br>(high vs low)             | 0.36 | 0.19-0.66 | 0.001   |
| Progesterone receptor<br>(positive vs negative) | 0.42 | 0.24-0.76 | 0.004   |
| AKAP13 (high vs low)                            | 1.79 | 1.02-3.15 | 0.044   |

Multivariate Cox regression analysis for risk of progression after tamoxifen treatment for metastatic disease. \* Estrogen receptor low  $\geq 10\% < 75\%$ , high ( $\geq 75\%$ ). Only NKI patients were analyzed.
