# Supplementary material for: Protein Kinase A-induced tamoxifen resistance is mediated by anchoring protein AKAP13
Source: PubMed Central journal article supplement (PMC4536754; doi:10.1186/s12885-015-1591-4), 2015-08-14

# S4A

## AKAP95

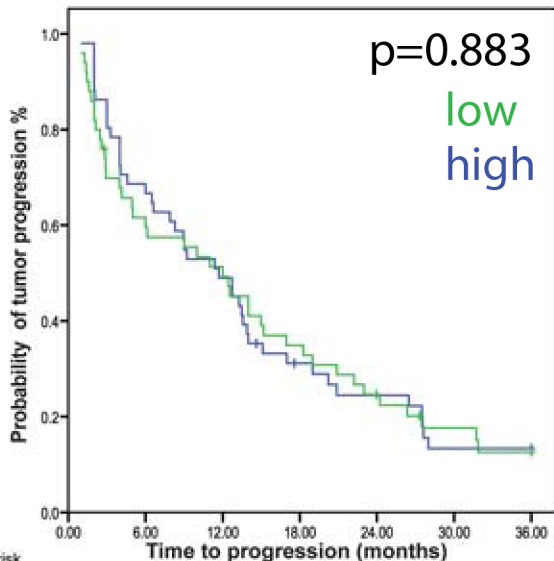

| No. at risk | 0.00 | 6.00 | 12.00 | 18.00 | 24.00 | 30.00 | 36.00 |
|-------------|------|------|-------|-------|-------|-------|-------|
| AKAP95low   | 51   | 35   | 25    | 14    | 11    | 6     | 6     |
| AKAP95high  | 50   | 30   | 25    | 17    | 11    | 7     | 5     |

# B

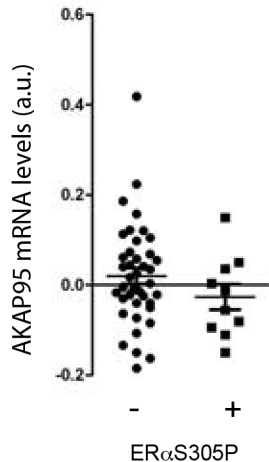

Supplement: 12885_2015_1591_MOESM5_ESM.pdf [file 12885_2015_1591_MOESM5_ESM.pdf]
